# Supplementary material for: The global contribution of invasive vertebrate eradication as a key island restoration tool
Source: PubMed Central journal article supplement (PMC9365850; doi:10.1038/s41598-022-14982-5), 2022-08-10
Supplement: 41598_2022_14982_MOESM1_ESM.pdf [file 41598_2022_14982_MOESM1_ESM.pdf]

1 **Supplementary Information**

2

3 **Title:** The global contribution of invasive vertebrate eradication as a key island restoration tool

4 **Authors:** Dena R. Spatz<sup>1\*</sup>, Nick D. Holmes<sup>2</sup>, David J. Will<sup>3</sup>, Stella Hein<sup>3,8</sup>, Zachary T. Carter<sup>4</sup>,

5 Rachel M. Fewster<sup>4</sup>, Brad Keitt<sup>5</sup>, Piero Genovesi<sup>6</sup>, Araceli Samaniego<sup>7</sup>, Donald A. Croll<sup>8</sup>, Bernie

6 R. Tershy<sup>8</sup> & James C. Russell<sup>4</sup>

7

8 **This document contains:**

9 • Supplementary Table S1: Invasive vertebrate eradication targets and eradication status

10 reported for 1550 events, 1872 - 2019.

11 • Supplementary Figures 1 - 4

12 • Supplementary Discussion

13

14 **Supplementary Table S1.** Invasive vertebrate eradication targets and eradication status reported  
 15 for 1550 events, 1872 - 2019. Completed events include the event status of successful, successful  
 16 and subsequently reinvaded, or failed. Ongoing events include the event status of in progress or  
 17 to be confirmed.

| Invasive target groups             | Completed Events | Incomplete Events | Ongoing Events | Planned Events | Total # Events |
|------------------------------------|------------------|-------------------|----------------|----------------|----------------|
| Rats ( <i>Rattus</i> spp.)         | 754              | 1                 | 39             | 26             | 820            |
| Ungulates                          | 167              | 9                 | 6              | 3              | 185            |
| Cats                               | 97               | 4                 | 7              | 9              | 117            |
| House Mice ( <i>Mus musculus</i> ) | 77               | 6                 | 0              | 8              | 91             |
| Rabbits & Hares                    | 82               | 5                 | 1              | 1              | 89             |
| Dogs & Foxes                       | 68               | 0                 | 1              | 0              | 69             |
| Stoats, Weasels, Mink & Mongoose   | 58               | 0                 | 7              | 1              | 66             |
| Other mammals                      | 30               | 1                 | 5              | 3              | 39             |
| Pigs                               | 27               | 1                 | 0              | 2              | 30             |
| Flying birds                       | 17               | 2                 | 4              | 1              | 24             |
| Non-flying birds                   | 14               | 0                 | 1              | 0              | 15             |
| Frogs & Toads                      | 2                | 1                 | 1              | 0              | 4              |
| Lizards                            | 1                | 0                 | 0              | 0              | 1              |
| <b>TOTALS</b>                      | 1394             | 30                | 72             | 54             | 1550           |

18  
 19  
 20  
 21  
 22  
 23  
 24  
 25  
 26  
 27  
 28  
 29  
 30



32 **Supplementary Figure 1.** Eradication events by invasive vertebrate taxa, 1900 – 2019. Rats  
33 (*Rattus spp.*) y-axis scaled to 800 eradication events due to high eradication event totals,  
34 remaining panels scale to 200 events.

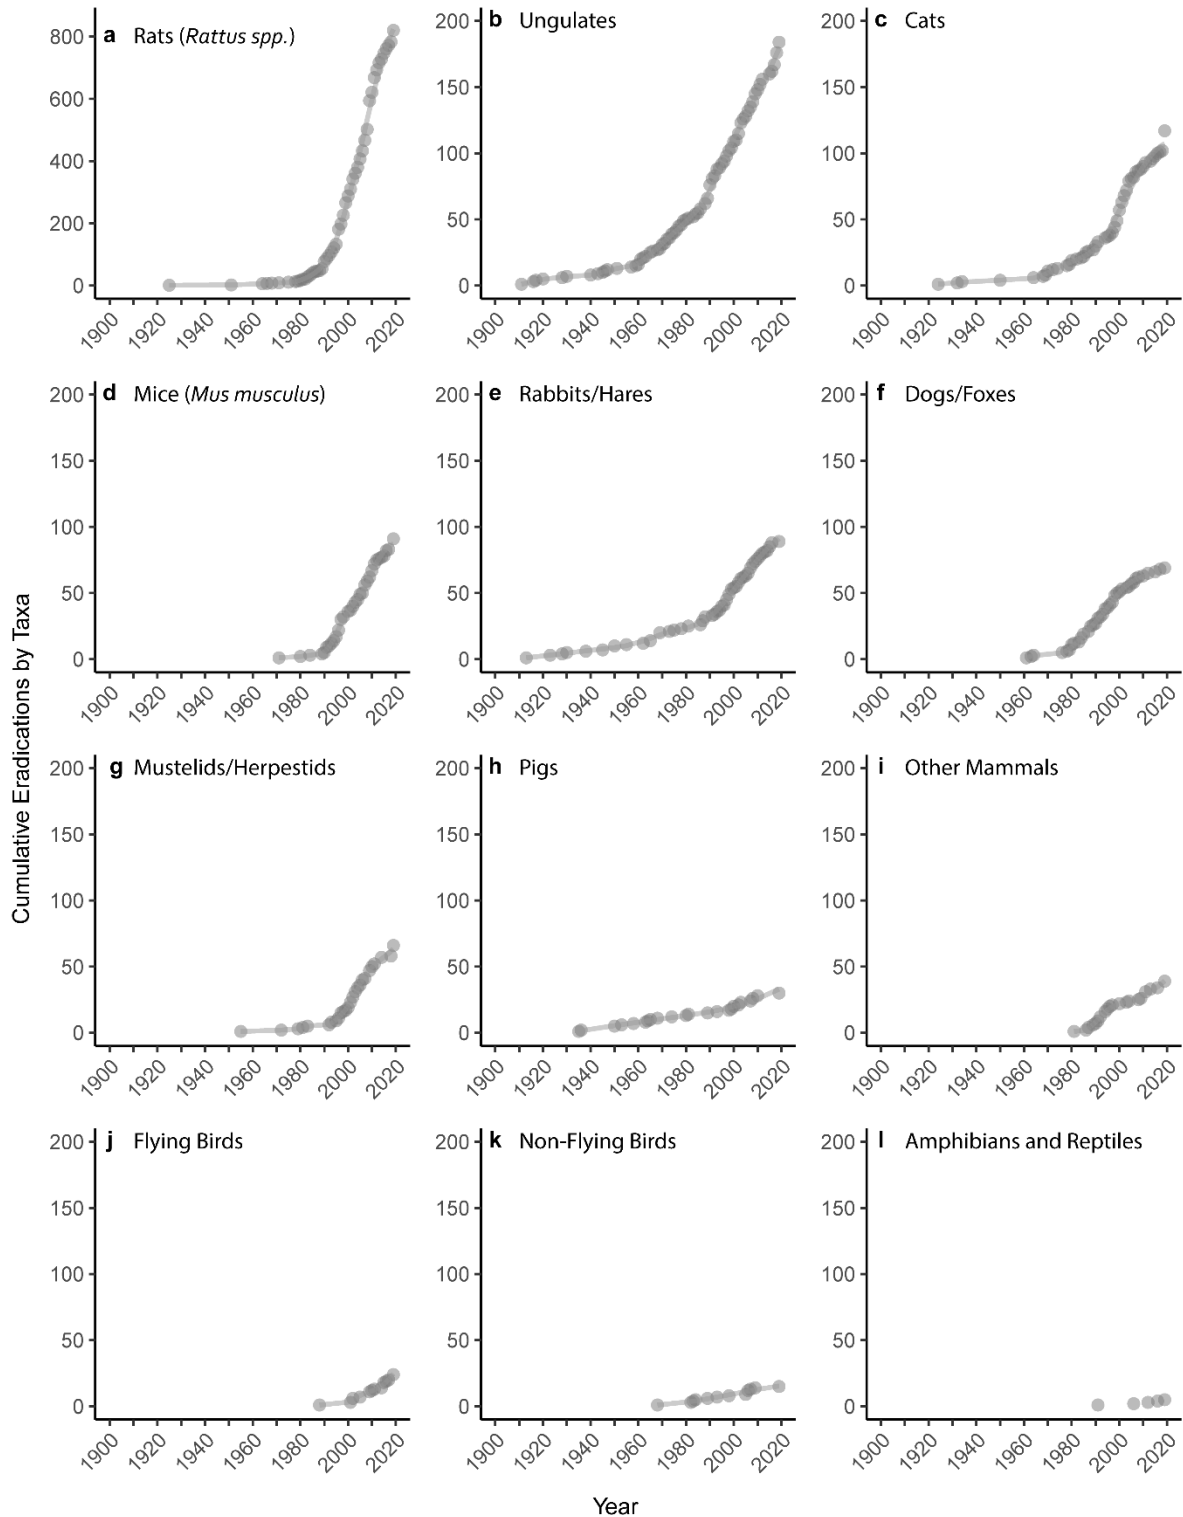

35 **Supplementary Figure 2.** Eradication events by implementing country, distinguishing the top  
36 eight countries by frequency, 1900 – 2019.

37

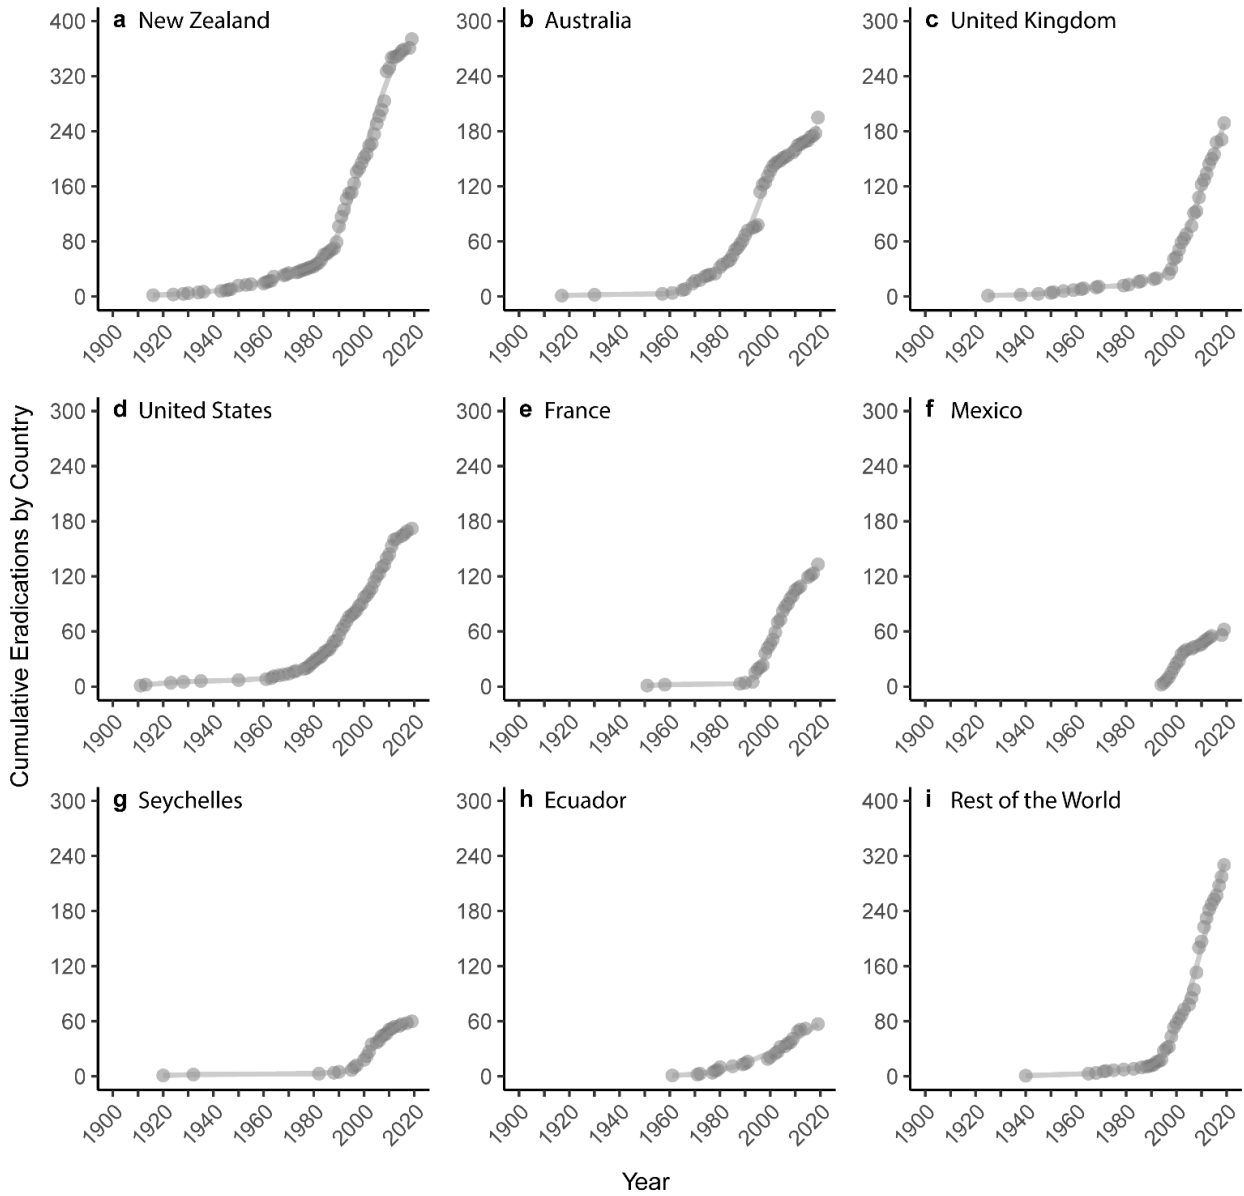

38

39

40

41

42

43 **Supplementary Figure 3.** Treated island area (ha), log scale, 1900 – 2019.

44

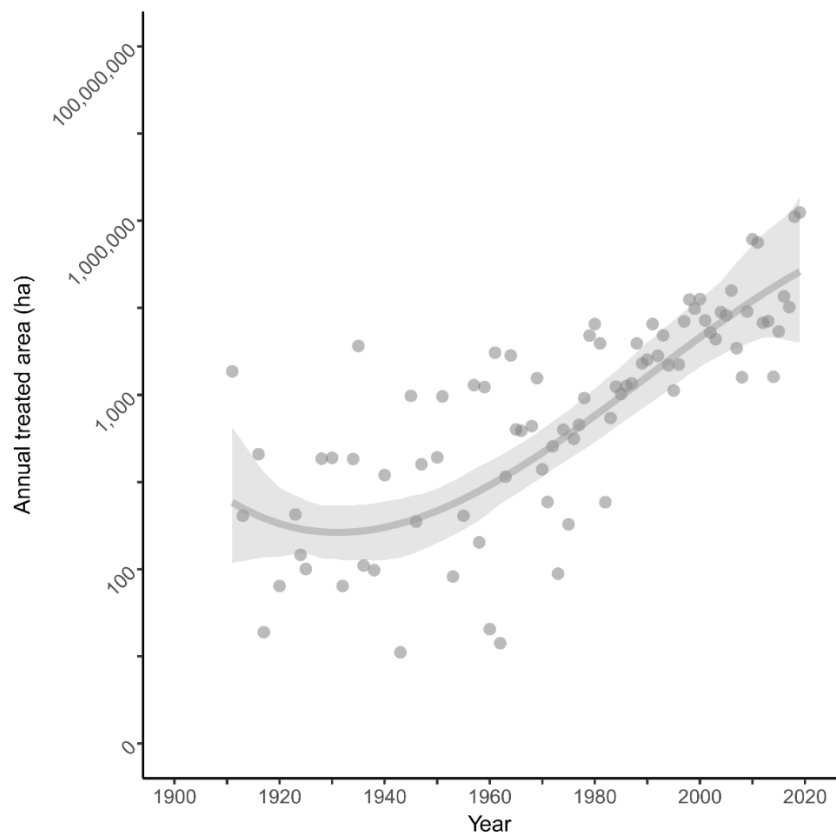

45

46 **Supplementary Figure 4.** Treated island area by taxa, 1900 – 2019.

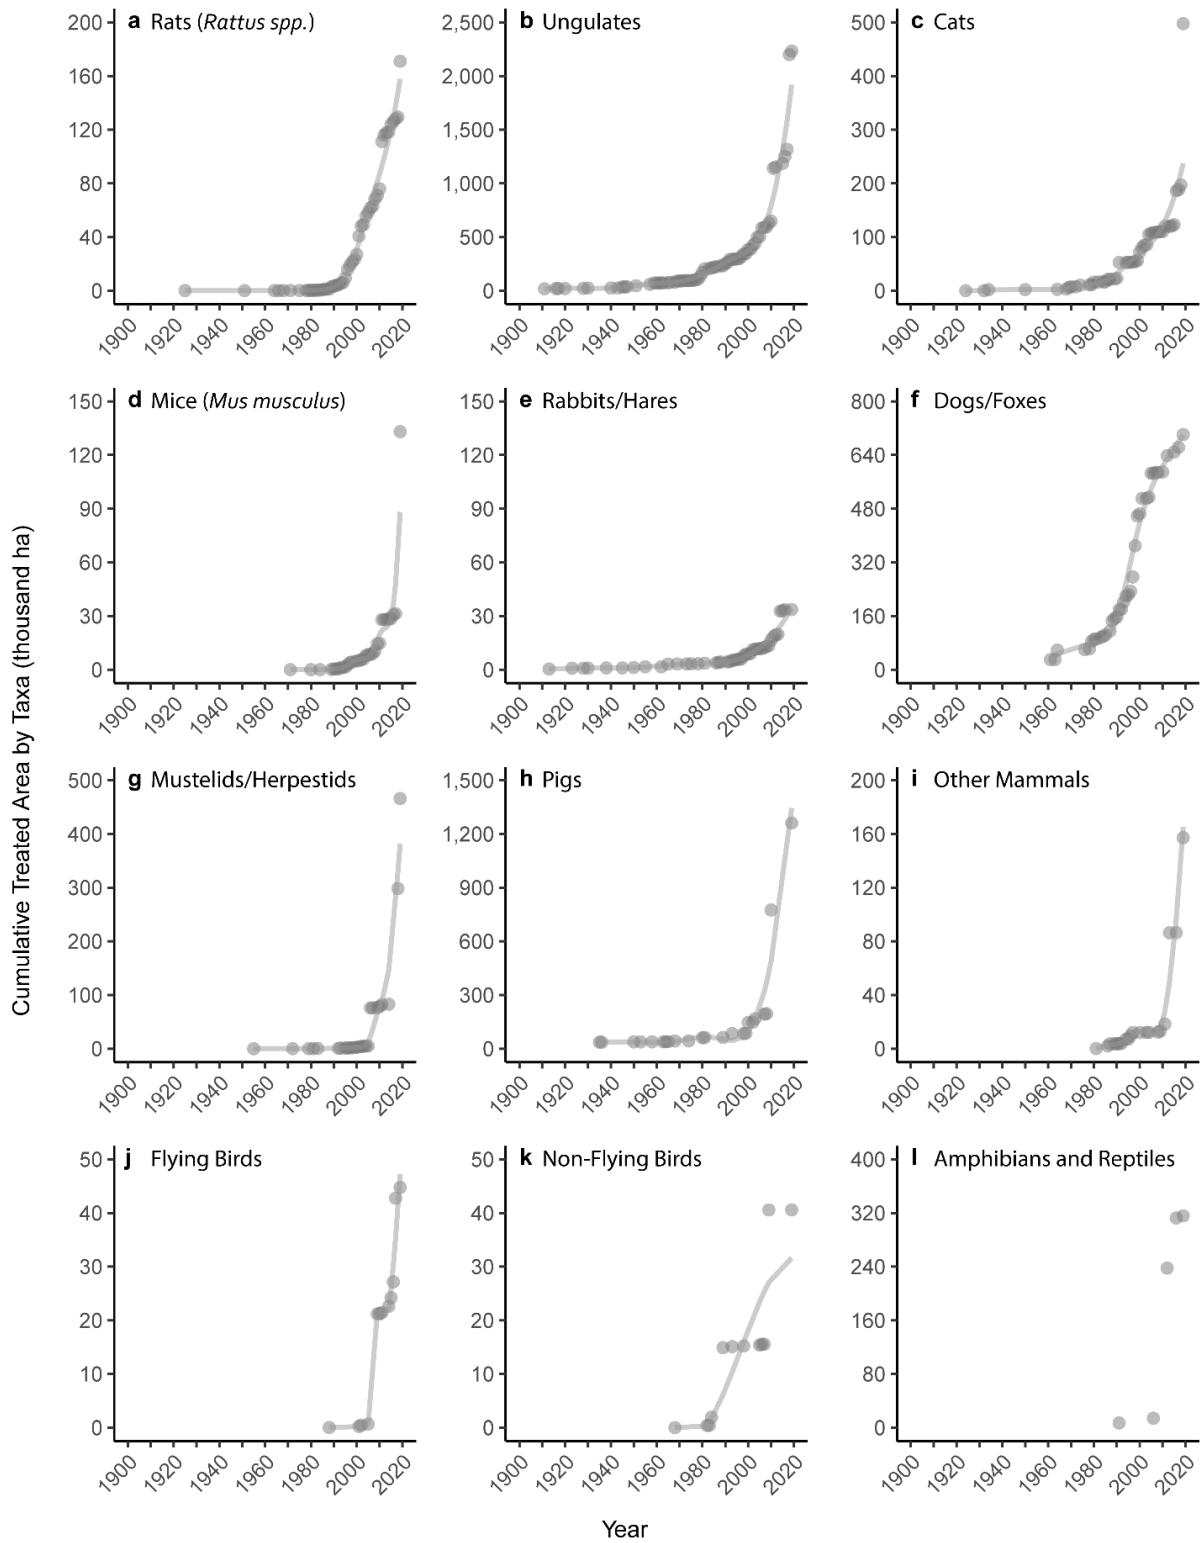

47

48

## 49 **Supplementary Discussion**

50

51 Excluded data and notable eradication events

52 A total of 2166 eradication events were documented in the database, of which 449 were  
53 excluded because of poor data quality. An additional 167 events were removed because the  
54 activity did not aim to remove an invasive wild animal from an entire island, the activity was a  
55 trial or had an unknown outcome, and/or the activity did not treat the entire island. Of those that  
56 did not treat an entire island, 59 were incursion responses and 49 were restricted range  
57 eradications. These activities do ultimately clear an island of an invasive species, but the invasive  
58 species is only targeted on part of an island, making these activities operationally different from  
59 and statistically unrepresentative as “whole island” eradications. However, notable restricted  
60 range eradication efforts do include the successful rat, mouse, and reindeer eradications from the  
61 3,500 km<sup>2</sup> South Georgia Island and the failed removal of cats and rabbits from the 6,715 km<sup>2</sup>  
62 Grande Terre Island. These projects play important roles in improving practitioner knowledge  
63 regarding invasive vertebrate eradication “restricted range” techniques, particularly on these  
64 relatively large islands.

65

66 A brief summary of invasive mouse eradication successes and failures

67 Invasive rodent eradications include rats (*Rattus*) with an 88% success rate, and mice (*Mus*  
68 *musculus*) with a 73% success rate, the latter representing the lowest among all eradication  
69 targets analyzed. This low success rate occurred during early rodent eradication efforts when  
70 mouse eradications were initially attempted concurrently with eradications for the larger bodied  
71 rat species, typically the primary target given impact<sup>1,2</sup>. However, it is now known that these



72 operational designs may not have catered to the ecology of mice, including differences in food  
73 preferences and smaller home ranges compared to rats<sup>2</sup>. In New Zealand, when these factors  
74 were considered and changes in operational techniques were subsequently undertaken, mouse  
75 eradication success rate was >90%<sup>3</sup>. Since the mid-2000s mouse eradication success rates  
76 globally have dramatically improved thanks to developed best practice techniques  
77 (Supplementary Table 1)<sup>1</sup>.

78

79 A brief summary of invasive avian eradications

80 This study primarily focuses on mammal eradications as they make up over 97% of invasive  
81 vertebrate eradication activities on islands. However, other invasive vertebrate taxa have been  
82 targeted for eradication. Notably, 64 eradication attempts of invasive birds occurred since the  
83 1960s, primarily since the 2000s (n=31, 48%), with an 83.7% success rate. Sixty-two percent of  
84 these invasive bird eradications targeted *Acridotheres tristis* (common myna) and *Gallirallus*  
85 *australis* (weka). However, 23 of these events (36%) were removed from our analysis because  
86 they were either incursion responses (n=5) or restricted range activities (n=18). Invasive birds  
87 are a major threat on islands<sup>4</sup>, with particularly negative impacts on agriculture, and hence food  
88 security for human communities<sup>5,6</sup>. hence, the ongoing removal of invasive bird populations  
89 from islands could be an important means of progressing towards both biodiversity and  
90 sustainable development goals<sup>7,8</sup>.

91

## 92 **Supplementary Discussion References**

- 93 1. Samaniego, A. *et al.* Factors leading to successful island rodent eradications following initial  
94 failure. *Conserv. Sci. Pract.* **3**, 1–12 (2021).
- 95 2. MacKay, J. W. B., Russell, J. C. & Murphy, E. C. Eradicating house mice from islands: successes,  
96 failures, and the way forward. *Manag. Vertebr. invasive species Proc. an Int. Symp.* **1971**, 294–  
97 304 (2007).

- 98 3. Broome, K. *et al.* House mice on islands: management and lessons from New Zealand. *Isl.*  
99 *invasives scaling up to meet challenge.* 100–107 (2019).
- 100 4. Evans, T., Kumschick, S., Şekercioğlu, C. & Blackburn, T. Identifying the factors that determine  
101 the severity and type of alien bird impacts.pdf. *Biodivers. Res.* **24**, 800–810 (2018).
- 102 5. Runde, D. E., Pitt, W. C. & Foster, J. T. Population ecology and some potential impacts of  
103 emerging populations of exotic parrots. *Manag. Vertebr. Invasive Species. Pap.* **42**. 338–360  
104 (2007).
- 105 6. Shiels, A. B. & Kalodimos, N. P. Biology and Impacts of Pacific Island Invasive Species. 15.  
106 *Psittacula krameri*, the Rose-Ringed Parakeet (Psittaciformes: Psittacidae). *Pacific Sci.* **73**, 421  
107 (2019).
- 108 7. United Nations. Transforming our world: the 2030 Agenda for Sustainable Development. in  
109 *Follow-up to the outcome of the Millennium Summit (A/69/L8.5)* (UN General Assembly, 2015).
- 110 8. United Nations. The Strategic Plan for Biodiversity 2011-2020 and the Aichi Biodiversity Targets.  
111 in *Conference of the Parties to the Convention on Biological Diversity, 10* (2010).  
112  
113
